# Supplementary material
Source: Springer Nature journal article supplement (https://www.springermedizin.de/resource/supplementary/13002_2010_199_MOESM1_ESM.pdf/9627366)
Supplement: MOESM1 [file 9627366]

# AUSTRALIA AND TASMANIA

## WITH EXPLORERS' ROUTES.

Overland Telegraphs shown thus 

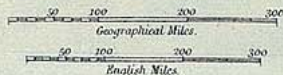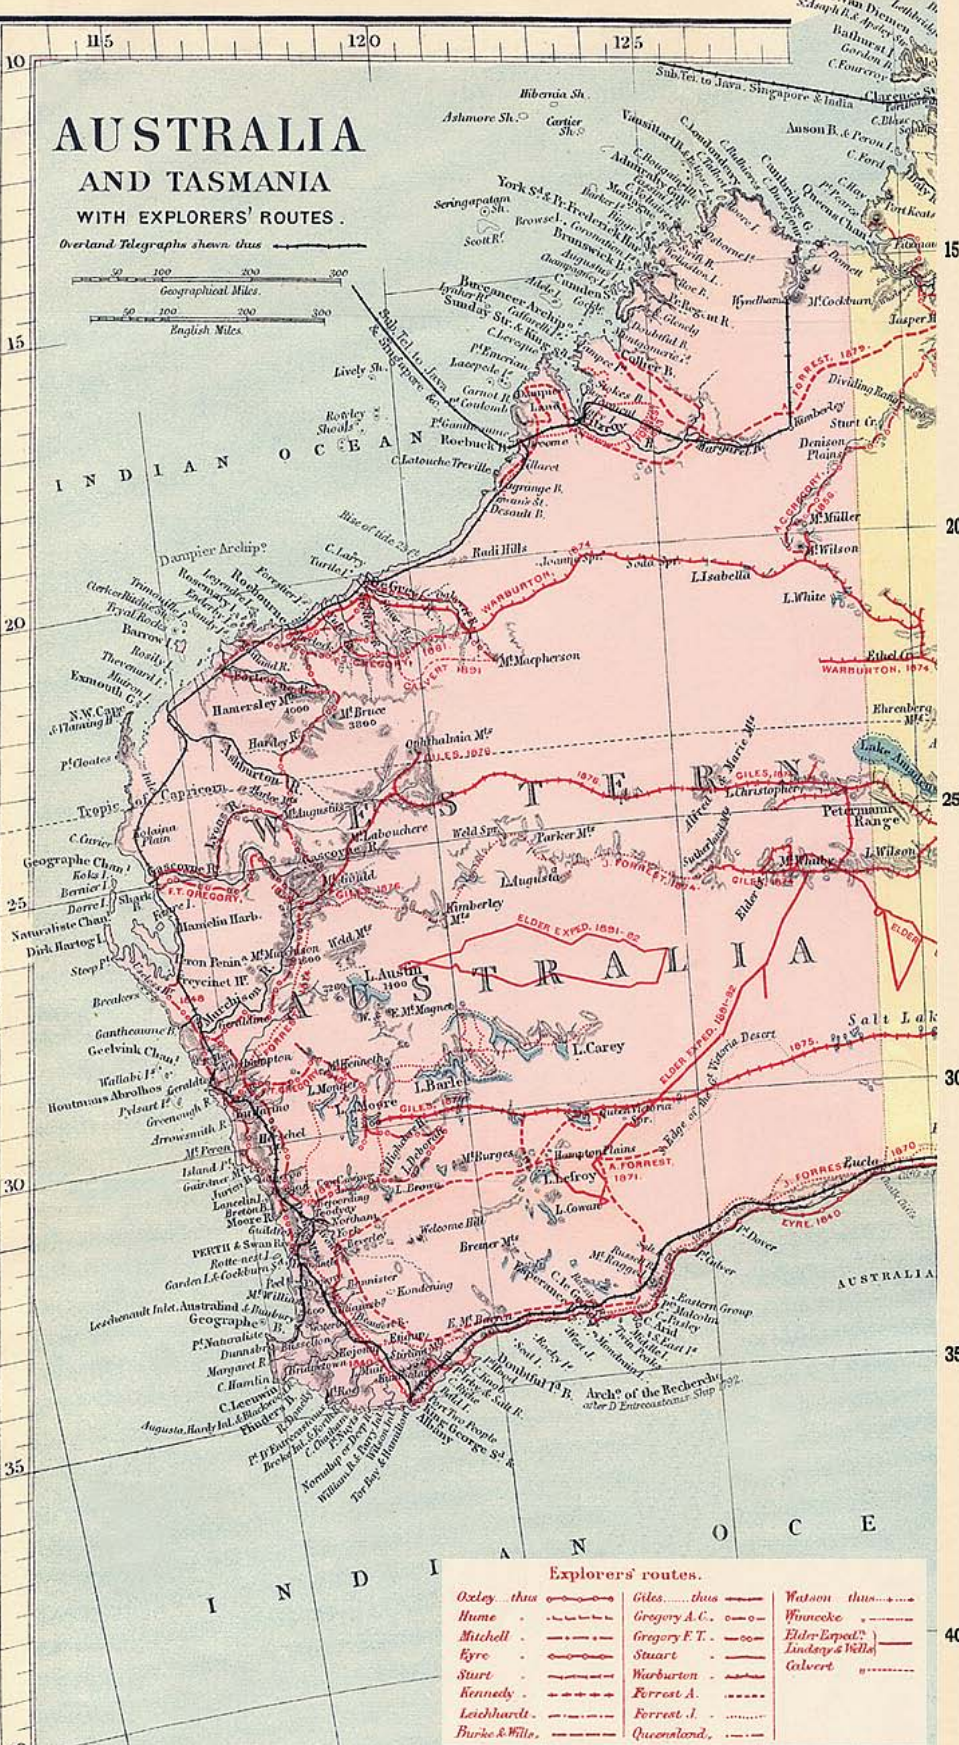

### Explorers' routes.

|                                                                                                          |                                                                                                     |                                                                                                        |
|----------------------------------------------------------------------------------------------------------|-----------------------------------------------------------------------------------------------------|--------------------------------------------------------------------------------------------------------|
| Oxley thus            | Giles..... thus  | Watson thus.....    |
| Hume - - - - -        | Gregory A.C.     | Finnecke - - - - -  |
| Mitchell - - - - -    | Gregory F.T.     | Elder-Exped.        |
| Eyre - - - - -        | Stuart           | Lindsay & Wells     |
| Sturt                 | Warburton        | Calvert             |
| Kennedy - - - - -     | Ferrosst A.      |                                                                                                        |
| Leichhardt - - - - -  | Ferrosst J.      |                                                                                                        |
| Burke & Wills         | Queenland        |                                                                                                        |
